# Supplementary material for: Prevalence and management of pulmonary nodules: a systematic review and meta-analysis
Source: PubMed Central journal article supplement — J Thorac Dis. 2024 Jul 24;16(7):4619–32. doi: 10.21037/jtd-24-874 (PMC11320231; doi:10.21037/jtd-24-874), 2024-07-24
Supplement: jtd-16-07-4619-supplementary.pdf [file jtd-16-07-4619-supplementary.pdf]

Table S1 Search strategy

| Database | Searches                                                                                                                                                                                                                                                                                                                                                                                                                                                                                                                                                                                                                                                                                                                                                                            | Results | Type     |
|----------|-------------------------------------------------------------------------------------------------------------------------------------------------------------------------------------------------------------------------------------------------------------------------------------------------------------------------------------------------------------------------------------------------------------------------------------------------------------------------------------------------------------------------------------------------------------------------------------------------------------------------------------------------------------------------------------------------------------------------------------------------------------------------------------|---------|----------|
| PubMed   | ("multiple pulmonary nodules"[MeSH Terms] OR ("multiple"[All Fields] AND "pulmonary"[All Fields] AND "nodules"[All Fields]) OR "multiple pulmonary nodules"[All Fields] OR ("pulmonary"[All Fields] AND "nodules"[All Fields]) OR "pulmonary nodules"[All Fields]) AND ("epidemiology"[MeSH Subheading] OR "epidemiology"[All Fields] OR "incidence"[All Fields] OR "incidence"[MeSH Terms] OR "incidences"[All Fields] OR "incident"[All Fields] OR "incidents"[All Fields] OR ("epidemiology"[MeSH Subheading] OR "epidemiology"[All Fields] OR "prevalence"[All Fields] OR "prevalence"[MeSH Terms] OR "prevalance"[All Fields] OR "prevalences"[All Fields] OR "prevalence s"[All Fields] OR "prevalent"[All Fields] OR "prevalently"[All Fields] OR "prevalents"[All Fields])) | 2,030   | Advanced |
| CNKI     | "pulmonary nodules" AND ("detection rate" OR "incidence") in Chinese                                                                                                                                                                                                                                                                                                                                                                                                                                                                                                                                                                                                                                                                                                                | 234     | Advanced |

CNKI, China National Knowledge Infrastructure.

## Appendix 1 Modified Newcastle-Ottawa risk-of-bias scoring system

### *Representativeness of the sample*

- Low: samples are randomly selected and represent the general population.
- Some concerns: samples are selected with some criteria such as smoking history.
- High: samples contain only male or only participants with high risk of lung cancer.

### *Sample size*

- Low: sample size was  $\geq 1,000$  participants.
- Some concerns: sample size was between 300 and 1,000 participants.
- High: sample size was  $< 300$  participants.

### *Ascertainment*

- Low: studies with no criteria for pulmonary nodule.
- Some concerns: studies with some reasonable criteria for pulmonary nodule definitions.
- High: studies with stringent criteria for pulmonary nodules.

### *Quality of descriptive statistics reporting*

- Low: studies reported descriptive statistics to describe the population (e.g., age, sex, and smoking history).
- Some concerns: studies missed one descriptive statistic.
- High: studies missed more than one descriptive statistic.

**Table S2** Risk of bias across studies

| Study                                                    | Representativeness | Sample size   | Ascertainment  | Descriptive statistics | Overall       |
|----------------------------------------------------------|--------------------|---------------|----------------|------------------------|---------------|
| The International Early Lung Cancer Action Program, 2006 | Low                | Low           | Some concerns  | Some concerns          | Some concerns |
| The National Lung Screening Trial, 2013                  | Some concerns      | Low           | Low            | Low                    | Low           |
| Wilson <i>et al.</i> , 2008                              | Some concerns      | Low           | Low            | Low                    | Low           |
| Henschke <i>et al.</i> , 1999                            | Some concerns      | Low           | Low            | Low                    | Low           |
| Pedersen <i>et al.</i> , 2009                            | Some concerns      | Low           | Low            | Low                    | Low           |
| Field <i>et al.</i> , 2016                               | Some concerns      | Low           | Some concerns  | Low                    | Low           |
| Hendrix <i>et al.</i> , 2023                             | Low                | Low           | Low            | Some concerns          | Low           |
| Ouyang <i>et al.</i> , 2019                              | Low                | Low           | Low            | Some concerns          | Low           |
| Xu <i>et al.</i> , 2020                                  | Low                | Some concerns | No information | Some concerns          | Some concerns |
| Pan <i>et al.</i> , 2020                                 | Low                | Low           | High           | Low                    | High          |
| Wei <i>et al.</i> , 2022                                 | Low                | Low           | Some concerns  | Low                    | Low           |
| Ji <i>et al.</i> , 2022                                  | Low                | Low           | Low            | Low                    | Low           |
| Wu <i>et al.</i> , 2022                                  | Low                | Low           | Low            | Low                    | Low           |
| Wu <i>et al.</i> , 2023                                  | Low                | Low           | No information | Low                    | Low           |
| Zhang <i>et al.</i> , 2023                               | Low                | Low           | No information | High                   | High          |
| Tapio Vehmas, 2008                                       | Low                | Some concerns | No information | Low                    | Some concerns |
| Hall <i>et al.</i> , 2009                                | Some concerns      | Some concerns | Low            | Some concerns          | Some concerns |
| Sigel <i>et al.</i> , 2020                               | Low                | Low           | No information | Some concerns          | Some concerns |
| Rinaldi <i>et al.</i> , 2010                             | Low                | High          | No information | Some concerns          | High          |
| Gould <i>et al.</i> , 2015                               | Low                | Low           | Low            | High                   | High          |
| Lin <i>et al.</i> , 2020                                 | Low                | Low           | No information | Some concerns          | Some concerns |
| Xu <i>et al.</i> , 2020                                  | Low                | Low           | Low            | Low                    | Low           |
| Li <i>et al.</i> , 2022                                  | Low                | Low           | Low            | Some concerns          | Low           |
| Zhao <i>et al.</i> , 2019                                | Low                | Low           | Low            | Some concerns          | Low           |
| Zhang <i>et al.</i> , 2022                               | Low                | Low           | Low            | Some concerns          | Low           |
| He <i>et al.</i> , 2018                                  | Low                | Low           | Low            | Some concerns          | Low           |
| Hammerschlag <i>et al.</i> , 2015                        | Low                | High          | Low            | High                   | High          |
| Yorgun <i>et al.</i> , 2010                              | Low                | Low           | No information | Some concerns          | Some concerns |
| Becker <i>et al.</i> , 2012                              | Some concerns      | Low           | Some concerns  | Some concerns          | Some concerns |
| Klaveren <i>et al.</i> , 2009                            | Some concerns      | Low           | No information | Low                    | Some concerns |
| Pegna <i>et al.</i> , 2009                               | High               | Low           | Some concerns  | Low                    | High          |
| Infante <i>et al.</i> , 2008                             | High               | Low           | Low            | Some concerns          | High          |
